# Supplementary material for: Solvent and additive interactions as determinants in the nucleation pathway: general discussion
Source: Royal Society of Chemistry journal article supplement (doi:10.1039/c5fd90038g), 2015-01-01
Supplement: c5fd90038g1.pdf [file c5fd90038g1.pdf]

# Nucleation of Metastable Aragonite $\text{CaCO}_3$ in Seawater

**Wenhao Sun**, S. Jayaraman, W. Chen, K.A. Persson, G Ceder

Faraday Discussions Slides

March 31<sup>st</sup>, 2015

Sun, Wenhao, et al. "Nucleation of metastable aragonite  $\text{CaCO}_3$  in seawater."  
*Proceedings of the National Academy of Sciences* 112.11 (2015): 3199-3204.

# Calcium Carbonate Formation in Marine Environments

The largest global scale CO<sub>2</sub> sink

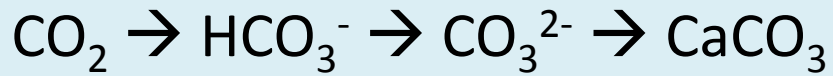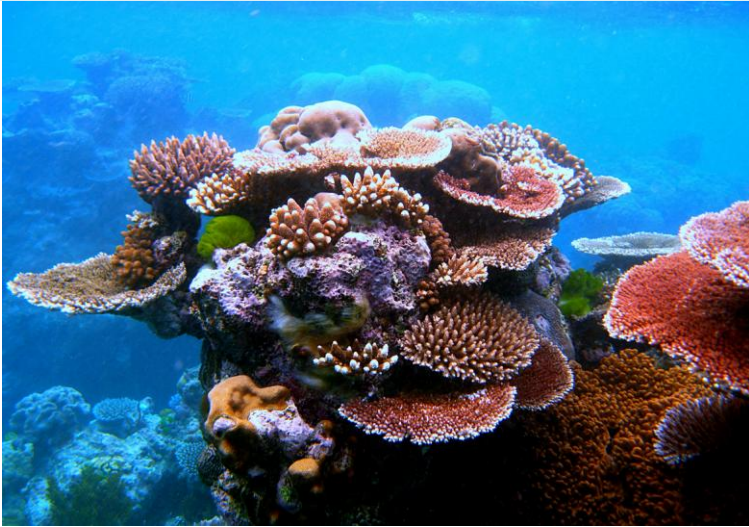

Atmospheric CO<sub>2</sub> deposits into the ocean, forming the shells of corals, pteropods, and molluscs.

Increasing ocean acidification reduces supersaturation of CaCO<sub>3</sub>

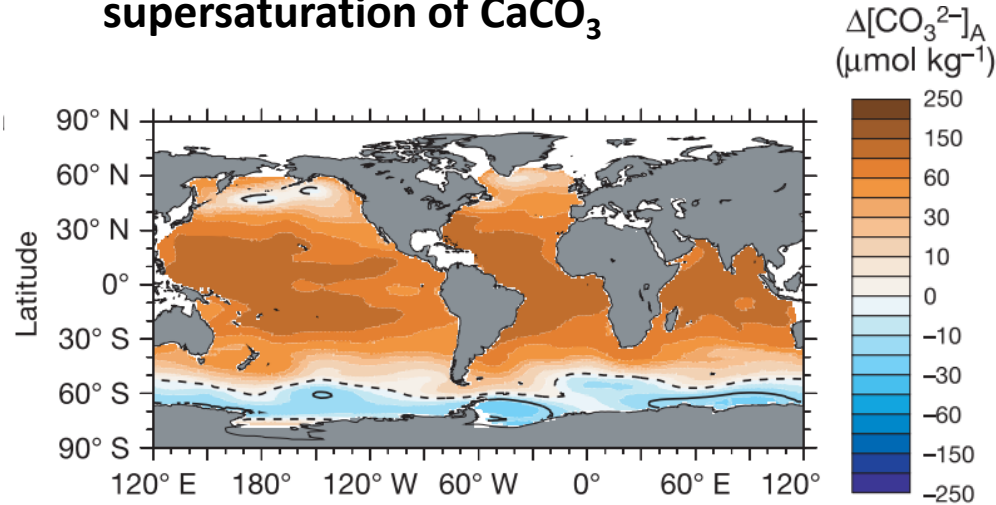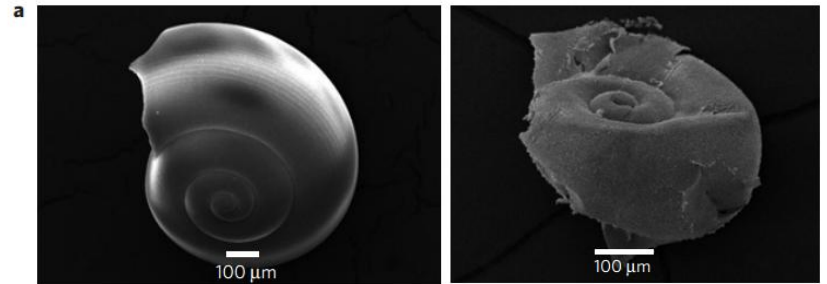

Healthy Shellfish

From Antarctica

# Calcite

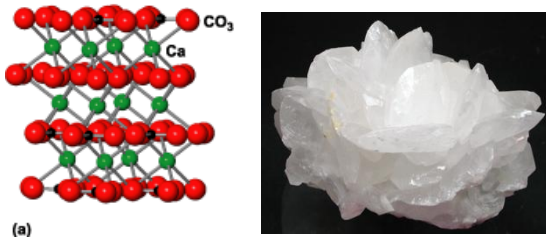

Equilibrium Phase

# Aragonite

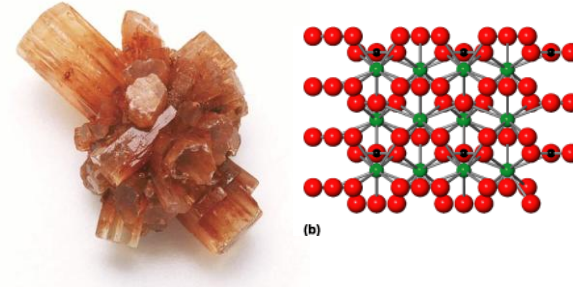

Precipitated phase in Seawater  
(Metastable by 2.5 meV/atom)

Metastable aragonite is 50% more soluble than calcite.

Biom mineralized aragonite (Corals, Molluscs, Pteropods) more vulnerable to ocean acidification

What are the solution conditions that promote the kinetic preference for Aragonite?

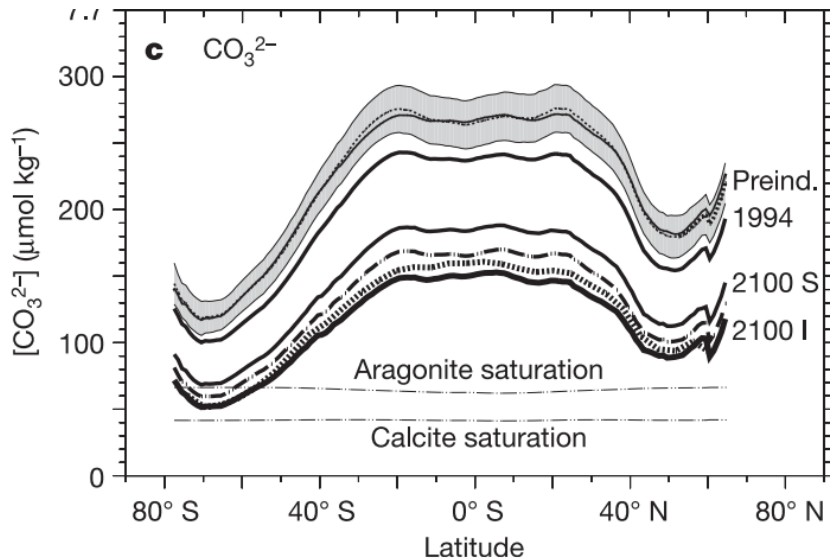

# Two Phases in Competitive Nucleation

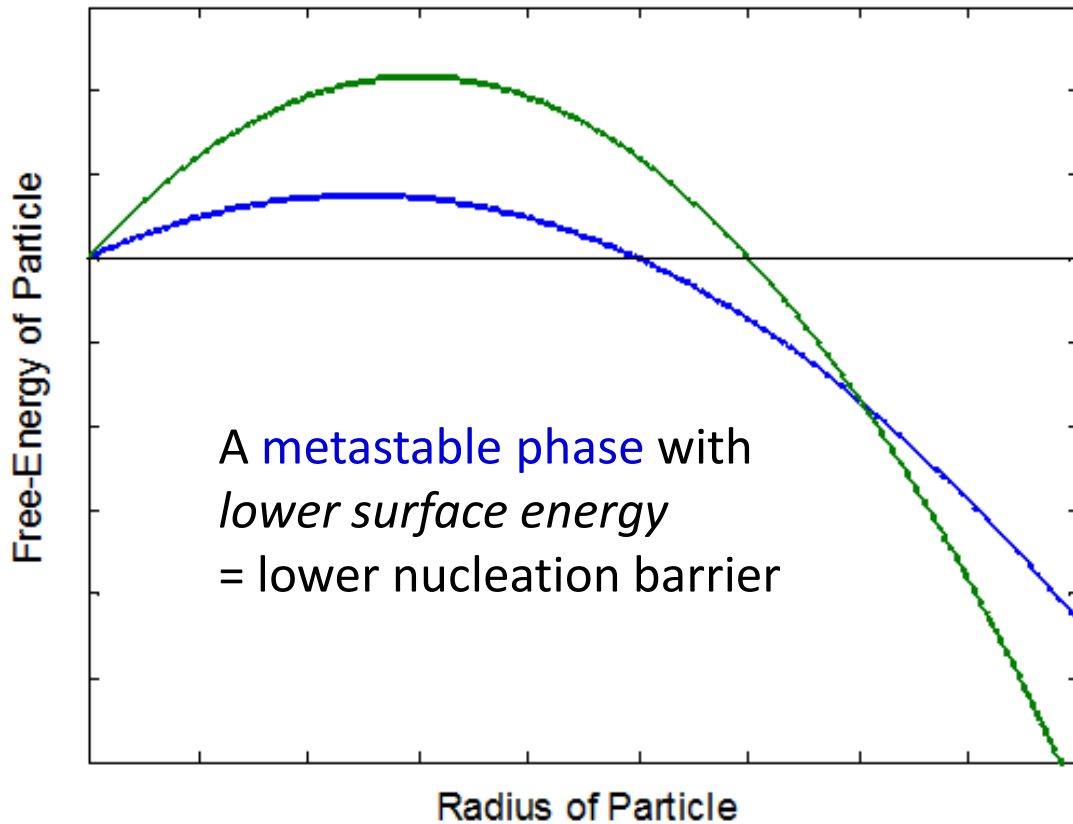

- Surface energy calculations from HT surfaces work

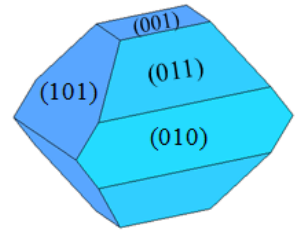

- Bulk Thermodynamic driving forces from Pourbaix formalism

$$\Delta G_{Bulk} = \mu_{solid} - \mu_{ions}$$

↑  
DFT

↑  
Referenced  
(Pourbaix)

$$J \sim \exp\left(\frac{-\Delta G_c}{k_B T}\right) \quad \Delta G_c \propto \frac{\gamma^3}{(\Delta G_{Bulk})^2}$$

Calculate steady-state nucleation rates!

# The role of aqueous $Mg^{2+}$ in inhibiting calcite nucleation

## Observations:

When **solution Mg/Ca > 2**,  
**Aragonite** is preferred over **Calcite**.

In seawater (**Mg/Ca = 5.2**), Calcite  
incorporates  $\sim 7\%$   $Mg^{2+}$  in solid solution

Aragonite precipitation not affected by Mg/Ca

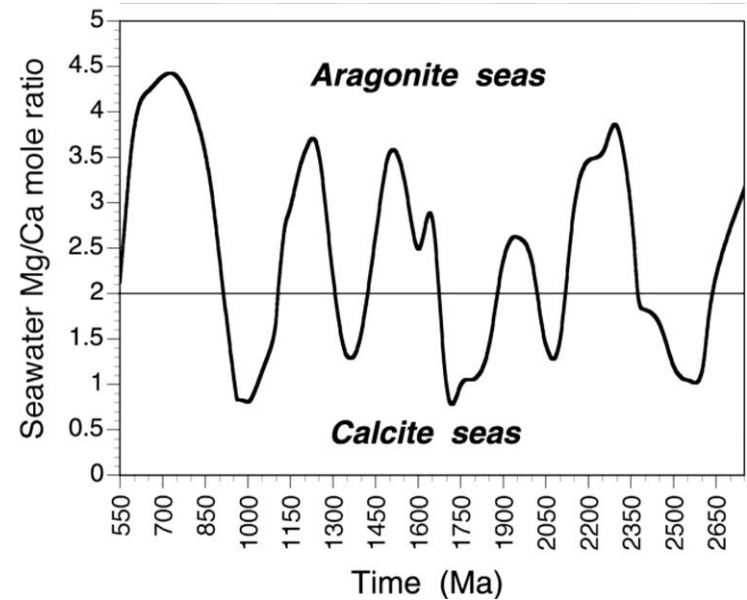

$$\Delta G_c \propto \frac{\gamma^3}{(\Delta G_{Bulk})^2}$$

Does  $Mg^{2+}$  affect:  
**Mg-calcite surface energy?**  
or  
**Mg-calcite solubility?**

# BULK MINERAL-SOLUTION EXCHANGE THERMODYNAMICS

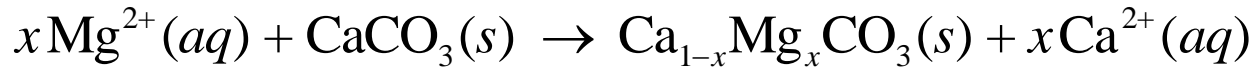

$$\Delta G_{\text{Ca}_{1-x}\text{Mg}_x\text{CO}_3} = \underbrace{\Delta H_{\text{Ca}_{1-x}\text{Mg}_x\text{CO}_3}^{\text{mix}}}_{\text{DFT calculated solid-solution formation enthalpy}} - \underbrace{T\Delta S_{\text{Ca}_{1-x}\text{Mg}_x\text{CO}_3}^{\text{mix}}}_{\text{Mixing Entropy Of Ideal Solution}} + \underbrace{xRT \ln \left( \left( \frac{K_{sp}^{\text{MgCO}_3}}{K_{sp}^{\text{CaCO}_3}} \right) \left( \frac{a_{\text{Ca}^{2+}}}{a_{\text{Mg}^{2+}}} \right) \right)}_{\text{Chemical potential of ion Mg/Ca exchange with solution}}$$

DFT calculated  
solid-solution  
formation enthalpy

Mixing Entropy  
Of Ideal Solution

Chemical potential of ion  
Mg/Ca exchange with solution

*Solid-state  
mixing*

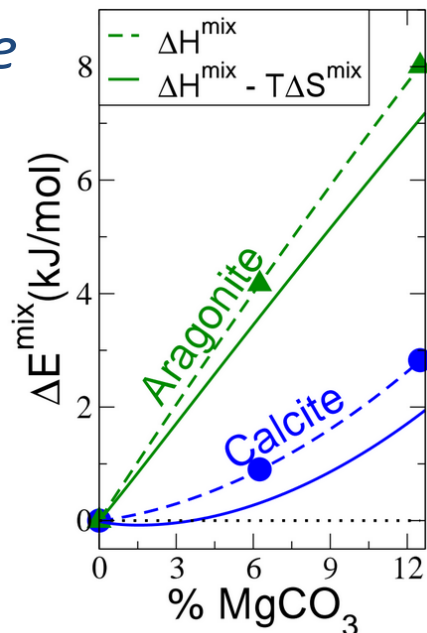

*Solution-Mineral  
Exchange*

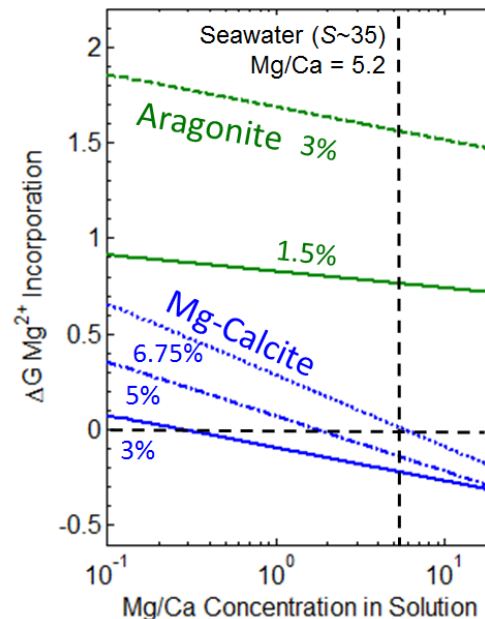

Equilibrium  $Mg^{2+}$  concentration in Calcite  
vs. Solution Mg/Ca ratio

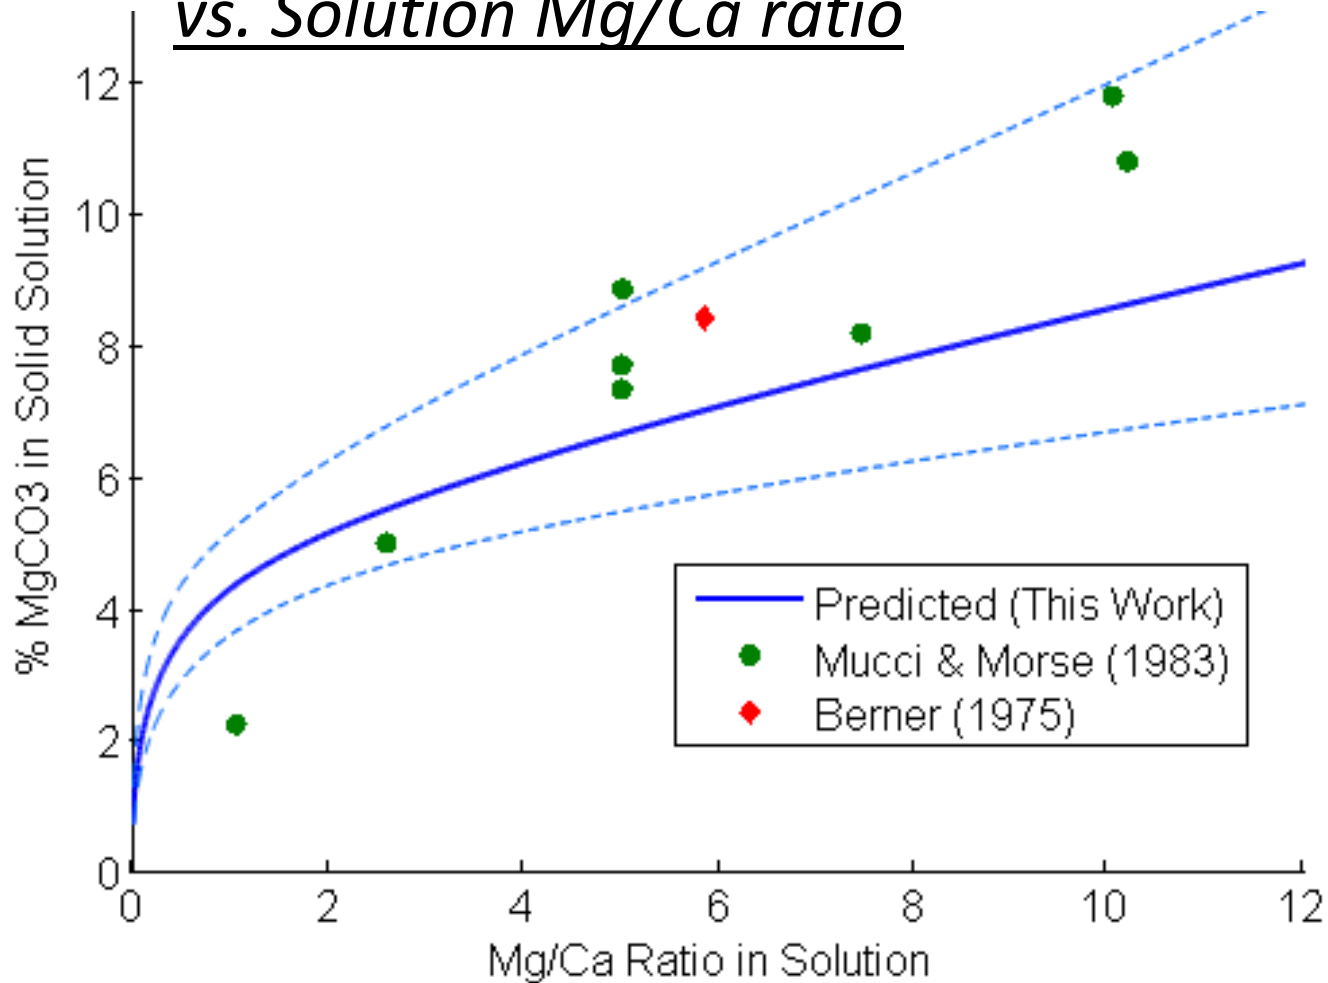

High enthalpy of  $Mg^{2+}$  incorporation into Aragonite can not be stabilized by any Mg/Ca ratio. (Empirically known, *theoretically confirmed*)

# Mg-CALCITE SOLUBILITY

$$-RT \ln K_{sp}^{Ca_{1-x}Mg_xCO_3} = (1-x)\mu_{Ca^{2+}}^\circ + x\mu_{Mg^{2+}}^\circ + \mu_{CO_3^{2-}}^\circ - \mu_{Ca_{1-x}Mg_xCO_3}$$

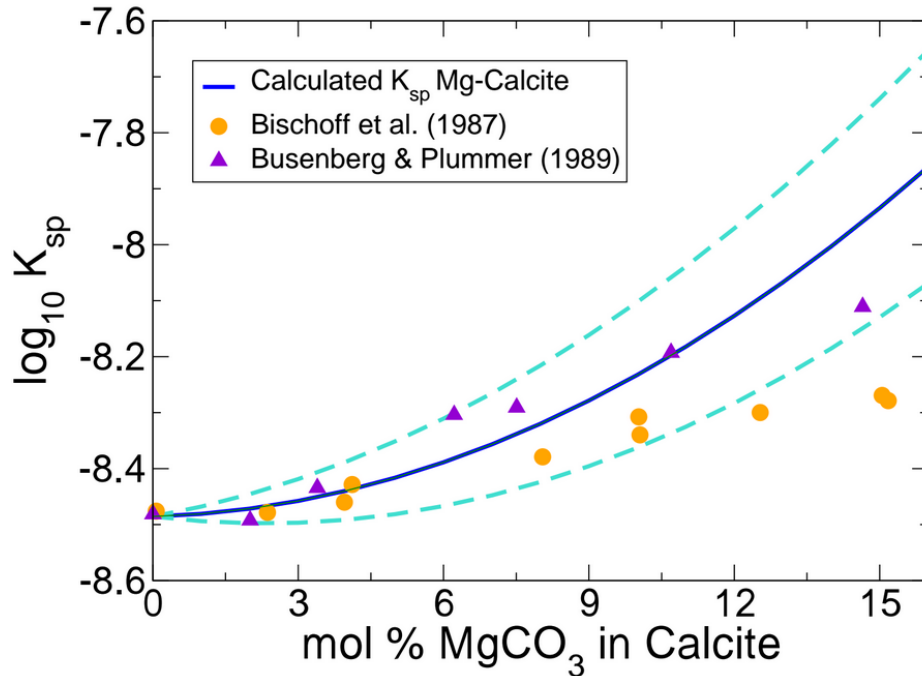

DFT

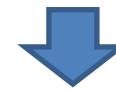

Expt.

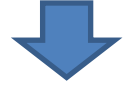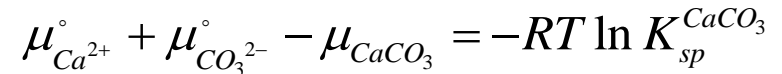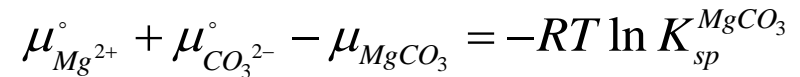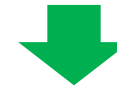

*Referenced*

We predict a 30% increase of increase of Mg-calcite solubility from  $10^{-8.48}$  to  $10^{-8.36}$  at ~7% MgCO<sub>3</sub>, in close agreement with experiment.

This corresponds to only 0.3 RT/mol reduction in bulk driving force. Typical nucleation driving forces are an order of magnitude higher.



# Surface energy of calcite increases with $MgCO_3$ in solid-solution

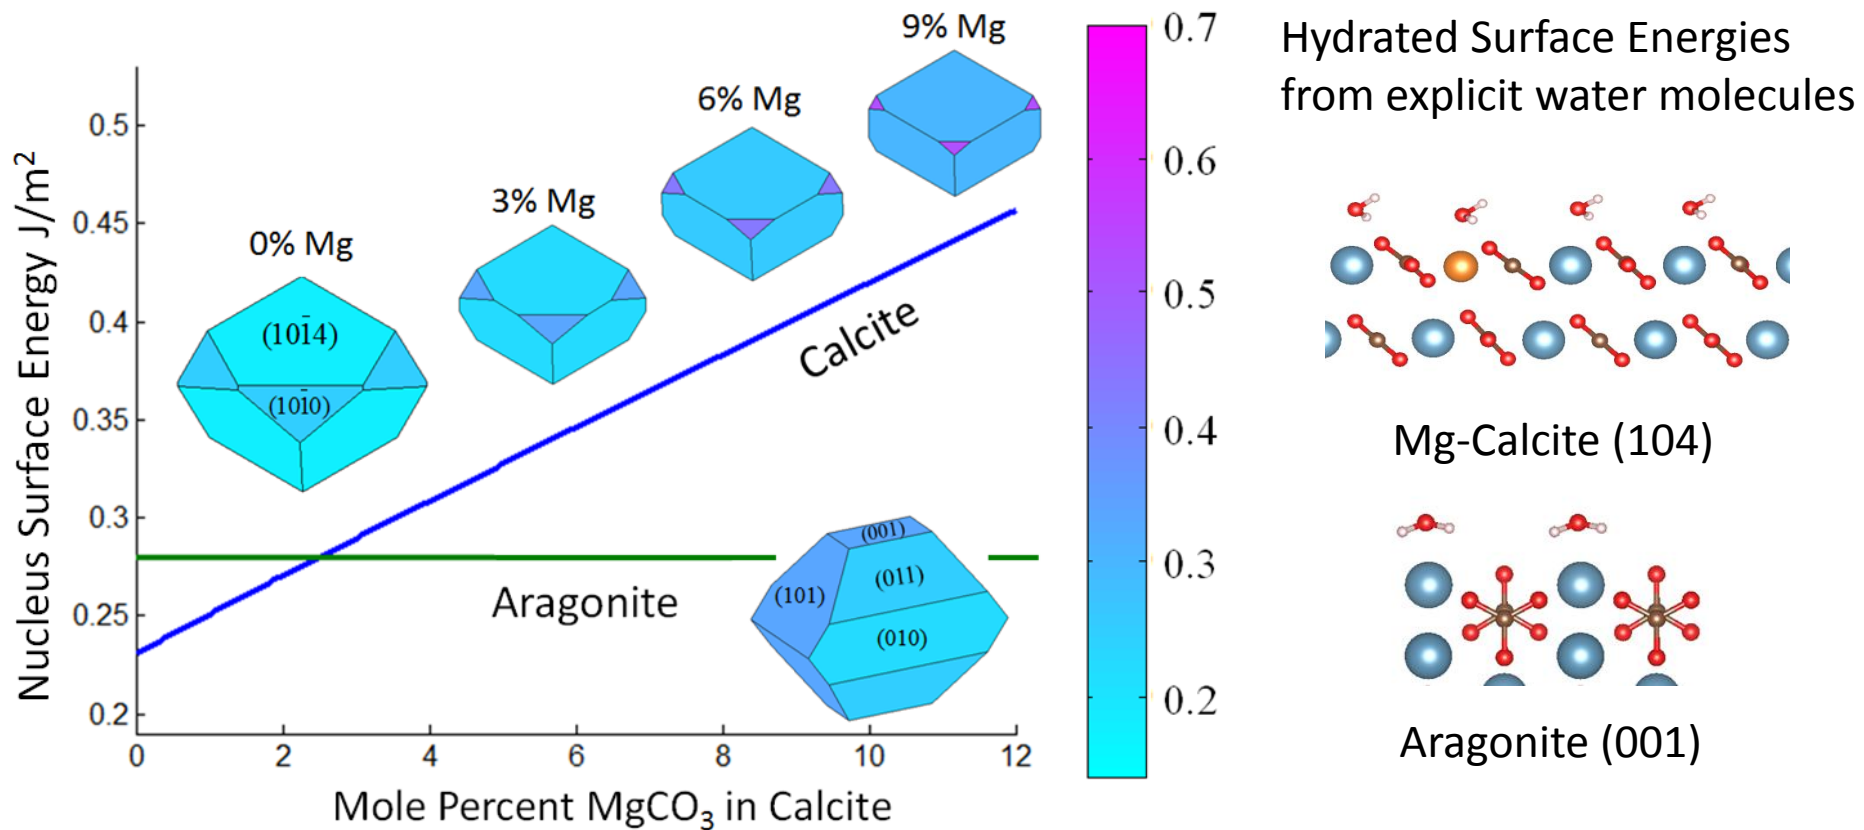

$\gamma_{\text{Calcite}}$  from 0.2  $J/m^2 \rightarrow$  0.35  $J/m^2$  at seawater Mg/Ca ratios

# Steady-State Nucleation Rates ( $J_{st}$ ) of Aragonite and Mg-Calcite

$$J \sim \exp\left(\frac{\gamma^3}{(RT \ln \sigma)^2}\right)$$

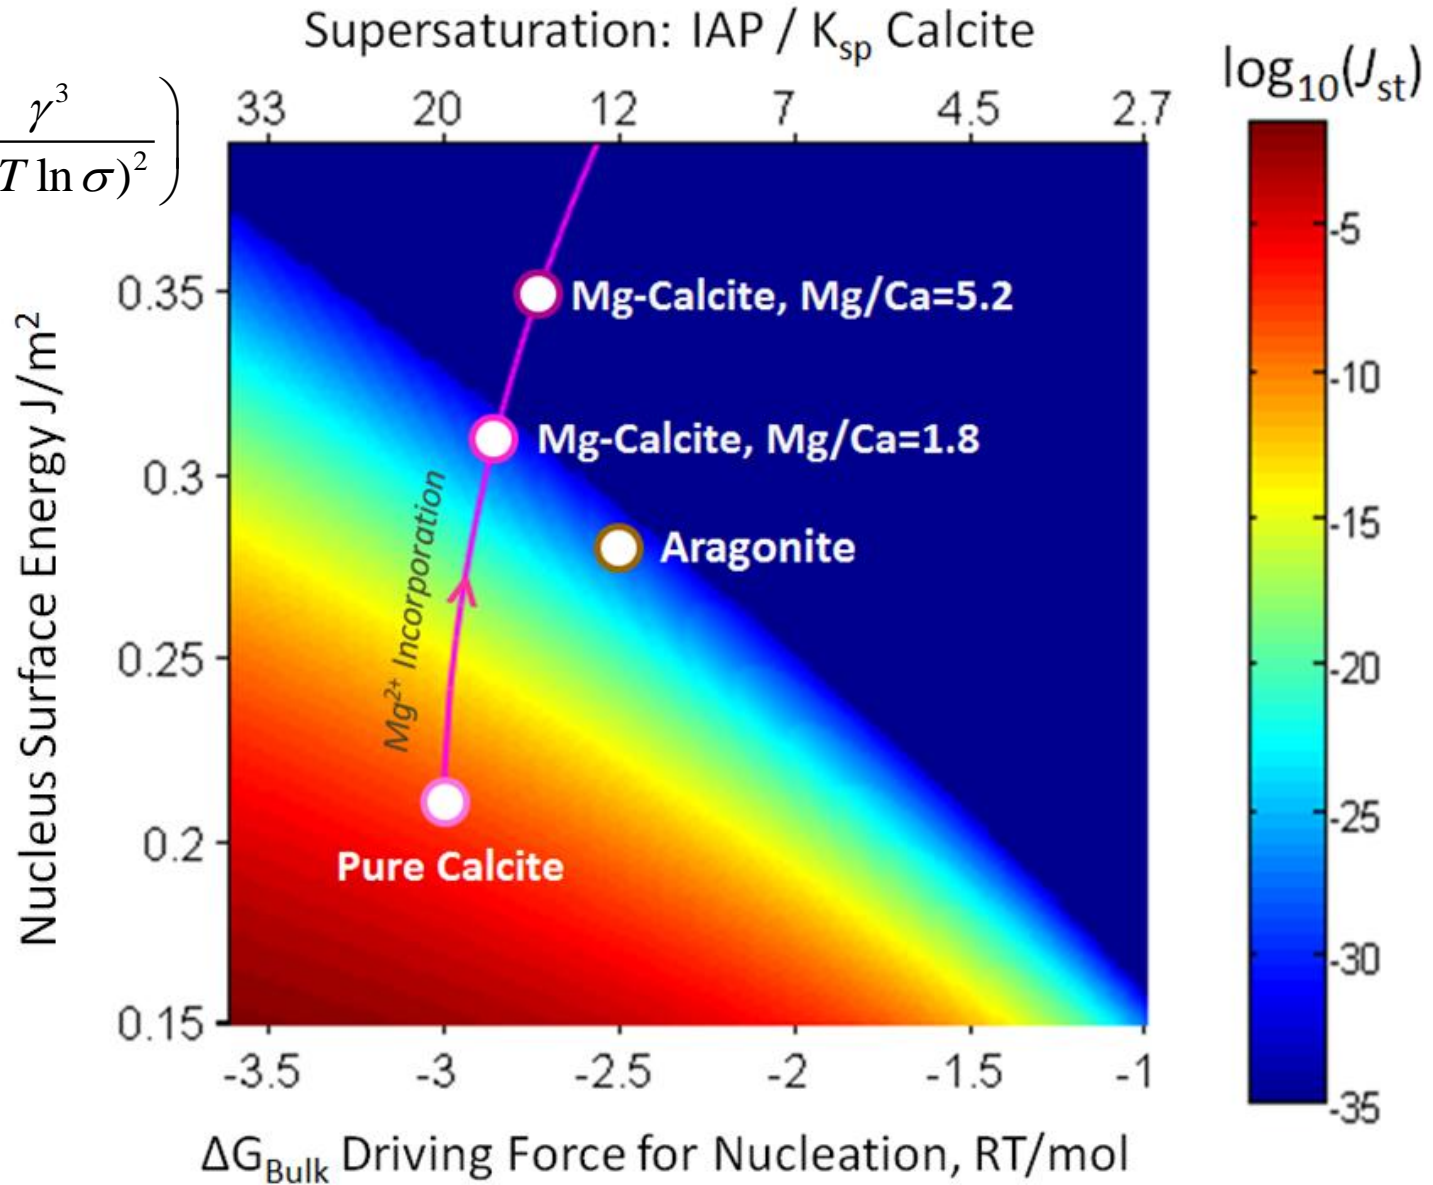

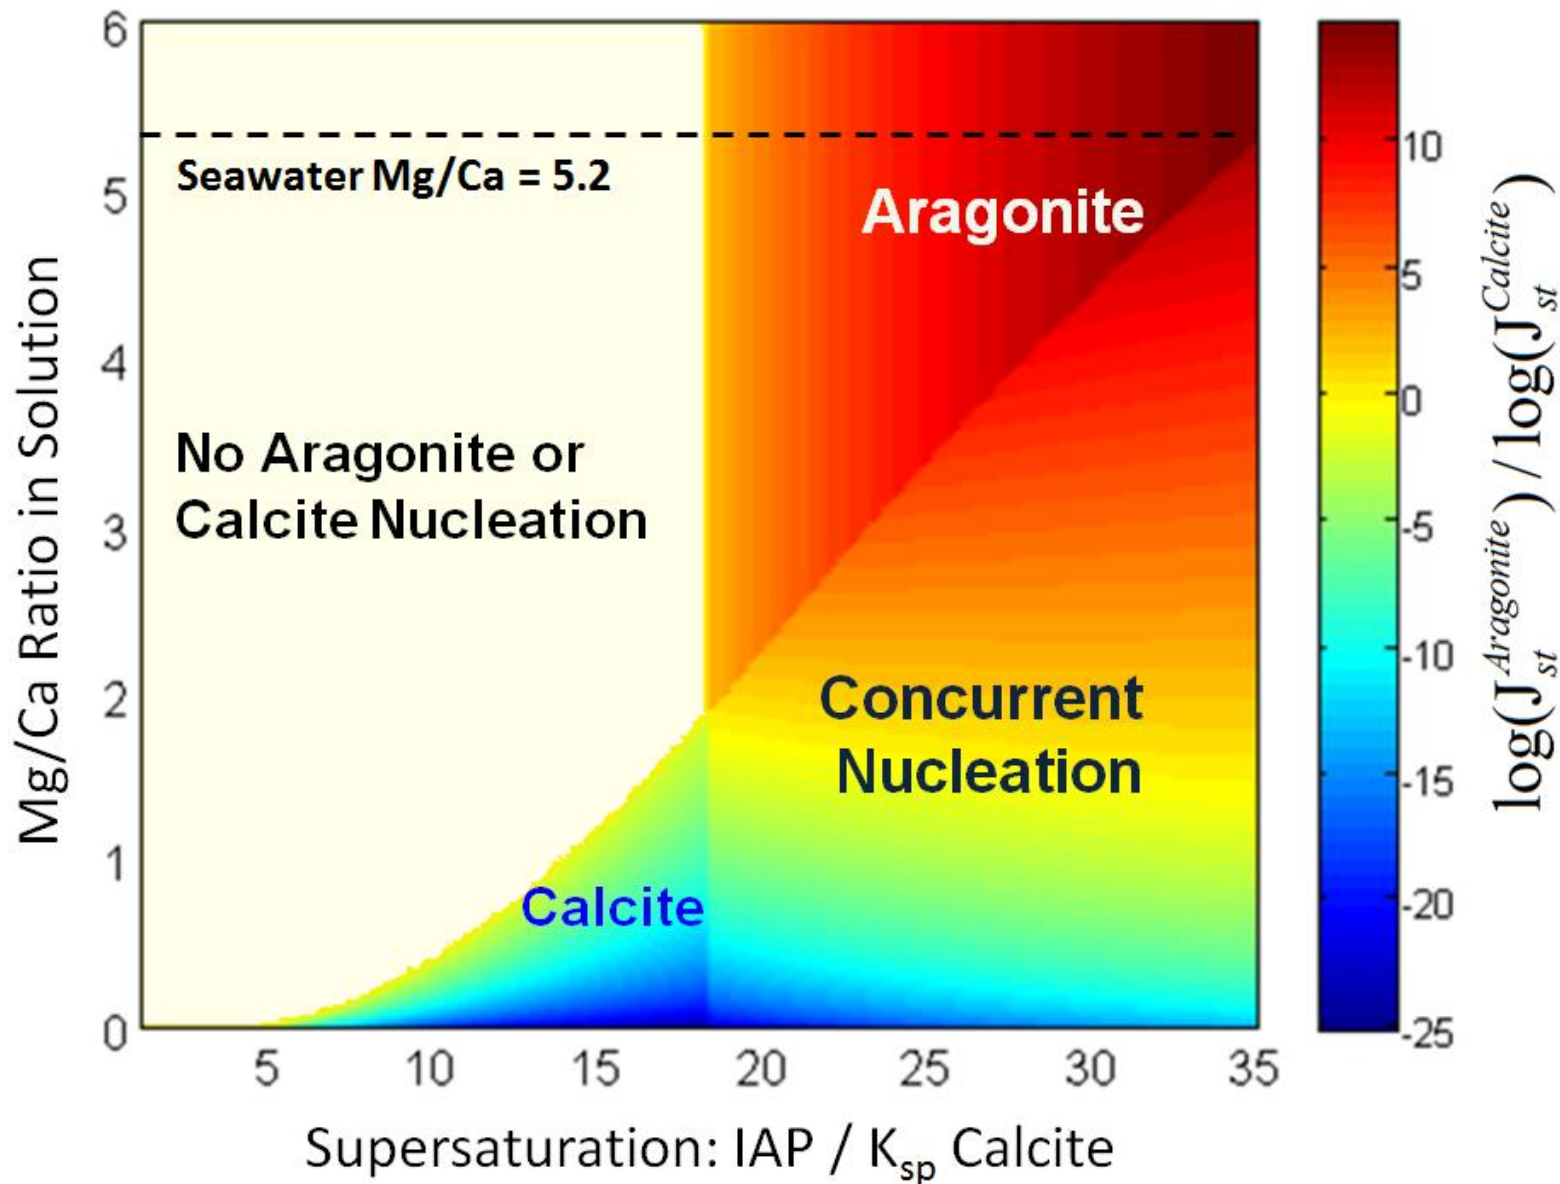

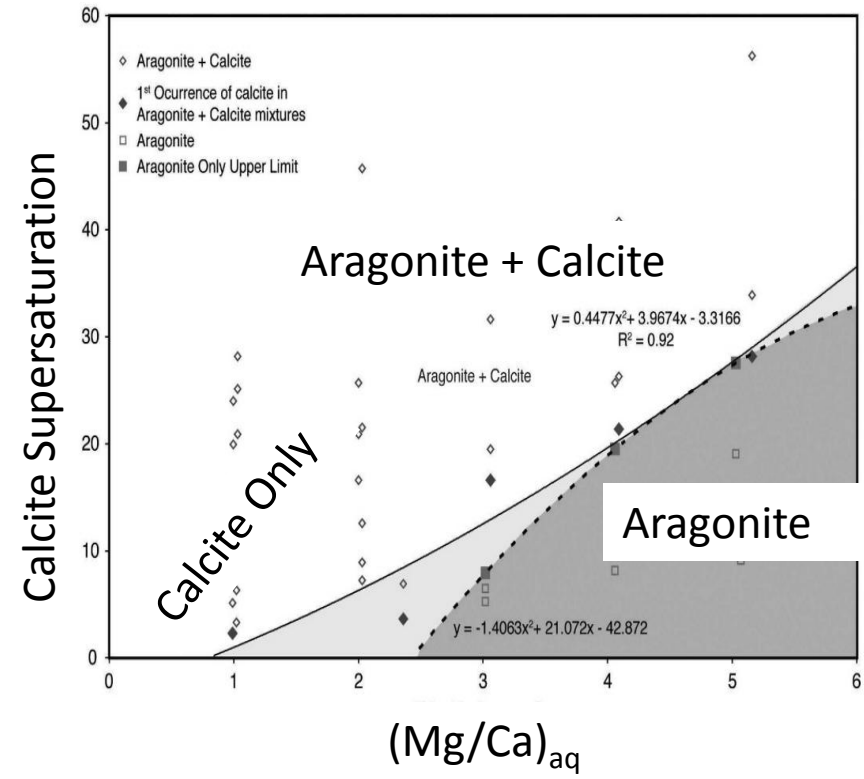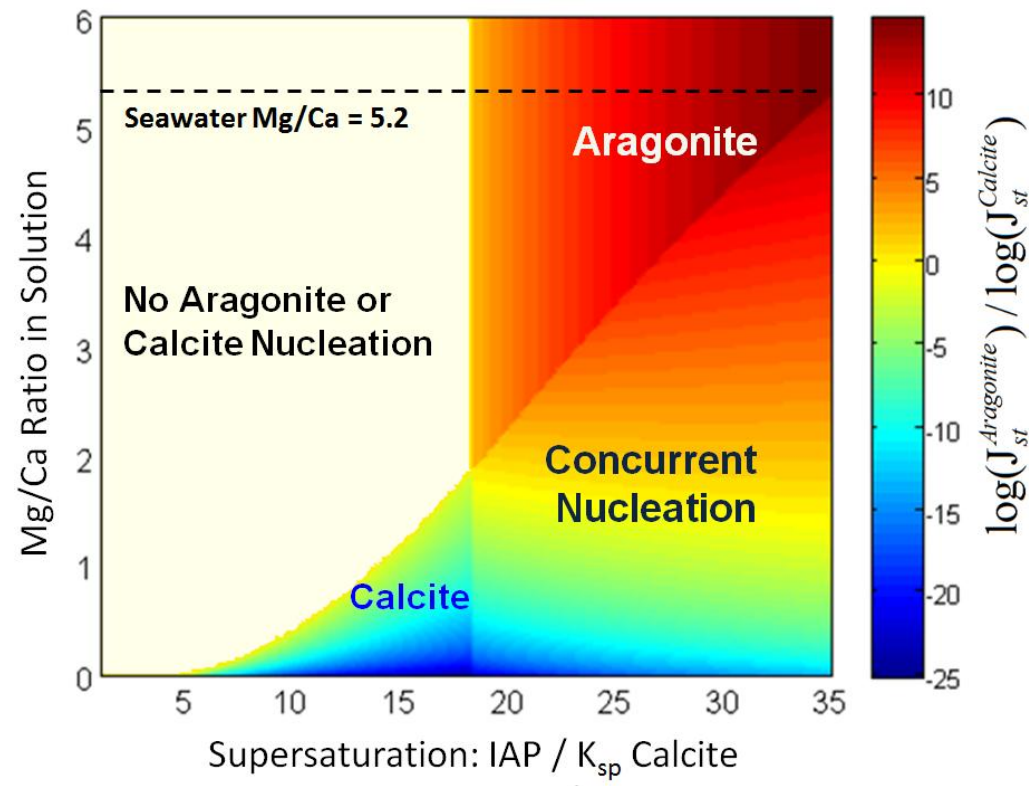

\*Choudens-Sanchez and Gonzales (2009)

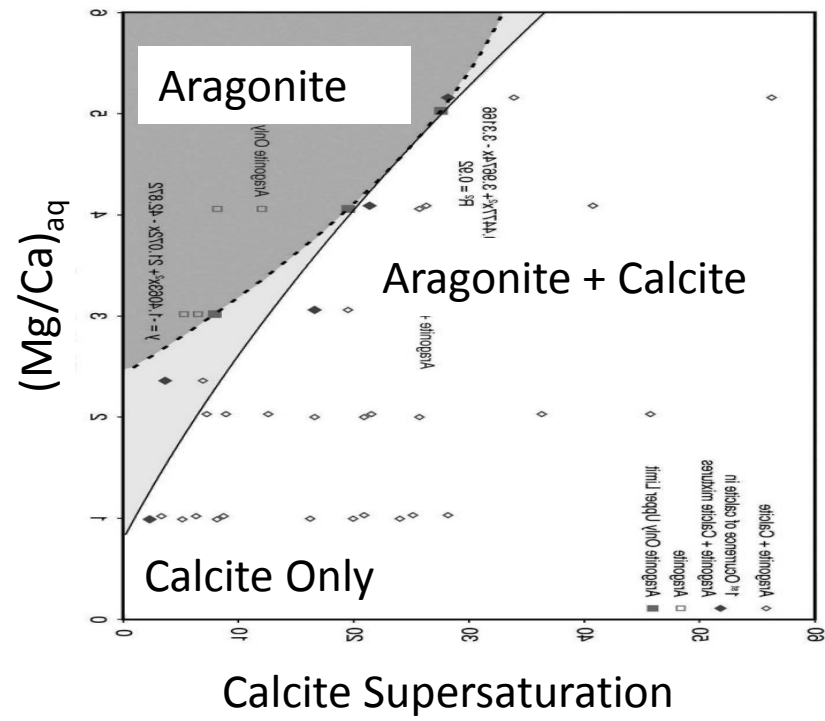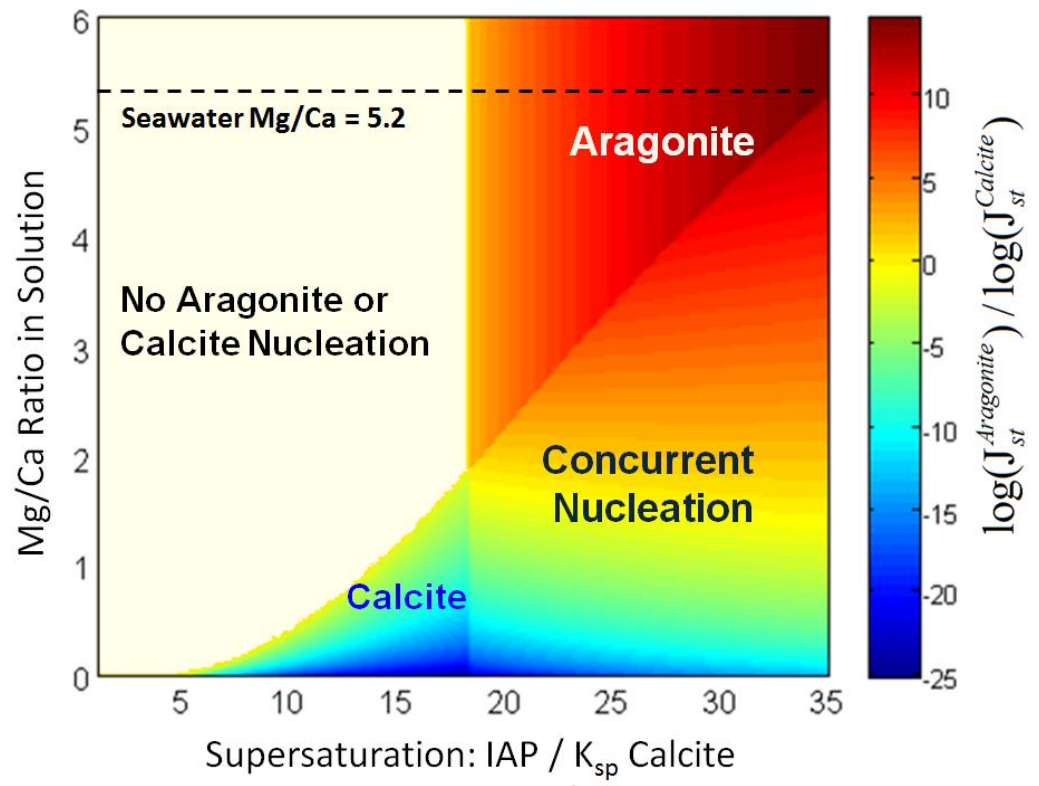

\*Choudens-Sanchez and Gonzales (2009)
